# Supplementary material for: Changing Primary School Children’s Engagement in Active School Travel Using Safe Routes to School Interventions: A Rapid Realist Review
Source: MDPI journal article supplement (doi:10.3390/ijerph19169976), 2022-08-12
Supplement: s1 [file s1]

# Search One

| Database Name: Scopus                                      |               |                                                                                                                                                                                                                             |                |
|------------------------------------------------------------|---------------|-----------------------------------------------------------------------------------------------------------------------------------------------------------------------------------------------------------------------------|----------------|
| Date of Search: 26/03/2020                                 |               |                                                                                                                                                                                                                             |                |
| Field Codes: Title, Abstract, and Keywords (TITLE-ABS-KEY) |               |                                                                                                                                                                                                                             |                |
| Search #                                                   | Concept       | Search Terms                                                                                                                                                                                                                | No. of Results |
| #1                                                         | Active Travel | Walking OR Cycling OR Bicycling OR "Active Transport*" OR "Active School Transport*" OR "Active School Travel" OR "Active* Travel*" OR Commut* OR "Independent* Mobil*" OR "Independent* Travel*" OR "Independent Licence*" | 515,402        |
| #2                                                         | Intervention  | "Safe Routes to School" OR "Safe Routes" OR "SRTS" OR "SR2S"                                                                                                                                                                | 2,091          |
| #3                                                         | Population    | Child* OR "School Child*" OR "Elementary School*" OR "Primary School*" OR Boys OR Girls OR Youth*                                                                                                                           | 3,576,701      |
| #4                                                         |               | #1 AND #2 AND #3                                                                                                                                                                                                            | 121            |

| Database Name: Scopus                                      |               |                                                                                                                                                                                                                             |                |
|------------------------------------------------------------|---------------|-----------------------------------------------------------------------------------------------------------------------------------------------------------------------------------------------------------------------------|----------------|
| Date of Search: 14/09/2021 (2021 Update)                   |               |                                                                                                                                                                                                                             |                |
| Field Codes: Title, Abstract, and Keywords (TITLE-ABS-KEY) |               |                                                                                                                                                                                                                             |                |
| Search #                                                   | Concept       | Search Terms                                                                                                                                                                                                                | No. of Results |
| #1                                                         | Active Travel | Walking OR Cycling OR Bicycling OR "Active Transport*" OR "Active School Transport*" OR "Active School Travel" OR "Active* Travel*" OR Commut* OR "Independent* Mobil*" OR "Independent* Travel*" OR "Independent Licence*" | 38,071         |
| #2                                                         | Intervention  | "Safe Routes to School" OR "Safe Routes" OR "SRTS" OR "SR2S"                                                                                                                                                                | 165            |
| #3                                                         | Population    | Child* OR "School Child*" OR "Elementary School*" OR "Primary School*" OR Boys OR Girls OR Youth*                                                                                                                           | 183,567        |
| #4                                                         |               | #1 AND #2 AND #3                                                                                                                                                                                                            | 9              |

# Search One

| Database Name: Web of Science |               |                                                                                                                                                                                                                             |                |
|-------------------------------|---------------|-----------------------------------------------------------------------------------------------------------------------------------------------------------------------------------------------------------------------------|----------------|
| Date of Search: 26/03/2020    |               |                                                                                                                                                                                                                             |                |
| Field Codes: Topic (TS)       |               |                                                                                                                                                                                                                             |                |
| Search #                      | Concept       | Search Terms                                                                                                                                                                                                                | No. of Results |
| #1                            | Active Travel | Walking OR Cycling OR Bicycling OR "Active Transport*" OR "Active School Transport*" OR "Active School Travel" OR "Active* Travel*" OR Commut* OR "Independent* Mobil*" OR "Independent* Travel*" OR "Independent Licence*" | 1,809,389      |
| #2                            | Intervention  | "Safe Routes to School" OR "Safe Routes" OR "SRTS" OR "SR2S"                                                                                                                                                                | 1,430          |
| #3                            | Population    | Child* OR "School Child*" OR "Elementary School*" OR "Primary School*" OR Boys OR Girls OR Youth*                                                                                                                           | 2,217,658      |
| #4                            |               | #1 AND #2 AND #3                                                                                                                                                                                                            | 162            |

| Database Name: Web of Science            |               |                                                                                                                                                                                                                             |                |
|------------------------------------------|---------------|-----------------------------------------------------------------------------------------------------------------------------------------------------------------------------------------------------------------------------|----------------|
| Date of Search: 14/09/2021 (2021 Update) |               |                                                                                                                                                                                                                             |                |
| Field Codes: Topic (TS)                  |               |                                                                                                                                                                                                                             |                |
| Search #                                 | Concept       | Search Terms                                                                                                                                                                                                                | No. of Results |
| #1                                       | Active Travel | Walking OR Cycling OR Bicycling OR "Active Transport*" OR "Active School Transport*" OR "Active School Travel" OR "Active* Travel*" OR Commut* OR "Independent* Mobil*" OR "Independent* Travel*" OR "Independent Licence*" | 98,211         |
| #2                                       | Intervention  | "Safe Routes to School" OR "Safe Routes" OR "SRTS" OR "SR2S"                                                                                                                                                                | 70             |
| #3                                       | Population    | Child* OR "School Child*" OR "Elementary School*" OR "Primary School*" OR Boys OR Girls OR Youth*                                                                                                                           | 112,181        |
| #4                                       |               | #1 AND #2 AND #3                                                                                                                                                                                                            | 9              |

# Search One

| Database Name: APA PsycInfo (via EBSCOhost)                 |               |                                                                                                                                                                                                                             |                |
|-------------------------------------------------------------|---------------|-----------------------------------------------------------------------------------------------------------------------------------------------------------------------------------------------------------------------------|----------------|
| Date of Search: 26/03/2020                                  |               |                                                                                                                                                                                                                             |                |
| Field Codes: Title, Abstract, and Keywords (TI, AB, and KW) |               |                                                                                                                                                                                                                             |                |
| Search #                                                    | Concept       | Search Terms                                                                                                                                                                                                                | No. of Results |
| #1                                                          | Active Travel | Walking OR Cycling OR Bicycling OR "Active Transport*" OR "Active School Transport*" OR "Active School Travel" OR "Active* Travel*" OR Commut* OR "Independent* Mobil*" OR "Independent* Travel*" OR "Independent Licence*" | 24,041         |
| #2                                                          | Intervention  | "Safe Routes to School" OR "Safe Routes" OR "SRTS" OR "SR2S"                                                                                                                                                                | 305            |
| #3                                                          | Population    | Child* OR "School Child*" OR "Elementary School*" OR "Primary School*" OR Boys OR Girls OR Youth*                                                                                                                           | 810,392        |
| #4                                                          |               | #1 AND #2 AND #3                                                                                                                                                                                                            | 27             |

| Database Name: APA PsycInfo                                 |               |                                                                                                                                                                                                                             |                |
|-------------------------------------------------------------|---------------|-----------------------------------------------------------------------------------------------------------------------------------------------------------------------------------------------------------------------------|----------------|
| Date of Search: 14/09/2021 (2021 Update)                    |               |                                                                                                                                                                                                                             |                |
| Field Codes: Title, Abstract, and Keywords (TI, AB, and KW) |               |                                                                                                                                                                                                                             |                |
| Search #                                                    | Concept       | Search Terms                                                                                                                                                                                                                | No. of Results |
| #1                                                          | Active Travel | Walking OR Cycling OR Bicycling OR "Active Transport*" OR "Active School Transport*" OR "Active School Travel" OR "Active* Travel*" OR Commut* OR "Independent* Mobil*" OR "Independent* Travel*" OR "Independent Licence*" | 791            |
| #2                                                          | Intervention  | "Safe Routes to School" OR "Safe Routes" OR "SRTS" OR "SR2S"                                                                                                                                                                | 309            |
| #3                                                          | Population    | Child* OR "School Child*" OR "Elementary School*" OR "Primary School*" OR Boys OR Girls OR Youth*                                                                                                                           | 888,235        |
| #4                                                          |               | #1 AND #2 AND #3                                                                                                                                                                                                            | 0              |

# Search One

| Database Name: CINAHL PLUS (via EBSCOhost)  |               |                                                                                                                                                                                                                             |                |
|---------------------------------------------|---------------|-----------------------------------------------------------------------------------------------------------------------------------------------------------------------------------------------------------------------------|----------------|
| Date of Search: 26/03/2020                  |               |                                                                                                                                                                                                                             |                |
| Field Codes: Title and Abstract (TI and AB) |               |                                                                                                                                                                                                                             |                |
| Search #                                    | Concept       | Search Terms                                                                                                                                                                                                                | No. of Results |
| #1                                          | Active Travel | Walking OR Cycling OR Bicycling OR "Active Transport*" OR "Active School Transport*" OR "Active School Travel" OR "Active* Travel*" OR Commut* OR "Independent* Mobil*" OR "Independent* Travel*" OR "Independent Licence*" | 40,740         |
| #2                                          | Intervention  | "Safe Routes to School" OR "Safe Routes" OR "SRTS" OR "SR2S"                                                                                                                                                                | 256            |
| #3                                          | Population    | Child* OR "School Child*" OR "Elementary School*" OR "Primary School*" OR Boys OR Girls OR Youth*                                                                                                                           | 589,255        |
| #4                                          |               | #1 AND #2 AND #3                                                                                                                                                                                                            | 22             |

| Database Name: CINAHL                       |               |                                                                                                                                                                                                                             |                |
|---------------------------------------------|---------------|-----------------------------------------------------------------------------------------------------------------------------------------------------------------------------------------------------------------------------|----------------|
| Date of Search: 14/09/2021 (2021 Update)    |               |                                                                                                                                                                                                                             |                |
| Field Codes: Title and Abstract (TI and AB) |               |                                                                                                                                                                                                                             |                |
| Search #                                    | Concept       | Search Terms                                                                                                                                                                                                                | No. of Results |
| #1                                          | Active Travel | Walking OR Cycling OR Bicycling OR "Active Transport*" OR "Active School Transport*" OR "Active School Travel" OR "Active* Travel*" OR Commut* OR "Independent* Mobil*" OR "Independent* Travel*" OR "Independent Licence*" | 4,851          |
| #2                                          | Intervention  | "Safe Routes to School" OR "Safe Routes" OR "SRTS" OR "SR2S"                                                                                                                                                                | 29             |
| #3                                          | Population    | Child* OR "School Child*" OR "Elementary School*" OR "Primary School*" OR Boys OR Girls OR Youth*                                                                                                                           | 66,589         |
| #4                                          |               | #1 AND #2 AND #3                                                                                                                                                                                                            | 1              |

## Search Two

| Database Name: Scopus                     |               |                                                                                                                                                                                                                                                                                                                                                        |                |
|-------------------------------------------|---------------|--------------------------------------------------------------------------------------------------------------------------------------------------------------------------------------------------------------------------------------------------------------------------------------------------------------------------------------------------------|----------------|
| Date of Search: 31/03/2020                |               |                                                                                                                                                                                                                                                                                                                                                        |                |
| Field Codes: Title & Abstract (TITLE-ABS) |               |                                                                                                                                                                                                                                                                                                                                                        |                |
| Search #                                  | Concept       | Search Terms                                                                                                                                                                                                                                                                                                                                           | No. of Results |
| #1                                        | Active Travel | Walking OR Cycling OR Bicycling OR "Active Transport*" OR "Active School Transport*" OR "Active School Travel" OR "Active* Travel*" OR Commut* OR "Independent* Mobil*" OR "Independent* Travel*" OR "Independent Licence*" OR "Crossing Guard*" OR "Crossing Supervisor" OR "Walking School Bus*" OR "School Travel Plan*" OR "Safe Routes to School" | 394,353        |
| #2                                        | Population    | Child* OR "School Child*" OR "Elementary School*" OR "Primary School*" OR Boys OR Girls OR Youth*                                                                                                                                                                                                                                                      | 2,272,688      |
| #3                                        | Qualitative   | Qualitative OR Interview* OR "Focus Group"                                                                                                                                                                                                                                                                                                             | 1,201,337      |
| #4                                        |               | #1 AND #2 AND #3                                                                                                                                                                                                                                                                                                                                       | 721            |

| Database Name: Scopus                     |               |                                                                                                                                                                                                                                                                                                                                                        |                |
|-------------------------------------------|---------------|--------------------------------------------------------------------------------------------------------------------------------------------------------------------------------------------------------------------------------------------------------------------------------------------------------------------------------------------------------|----------------|
| Date of Search: 14/09/2021 (2021 Update)  |               |                                                                                                                                                                                                                                                                                                                                                        |                |
| Field Codes: Title & Abstract (TITLE-ABS) |               |                                                                                                                                                                                                                                                                                                                                                        |                |
| Search #                                  | Concept       | Search Terms                                                                                                                                                                                                                                                                                                                                           | No. of Results |
| #1                                        | Active Travel | Walking OR Cycling OR Bicycling OR "Active Transport*" OR "Active School Transport*" OR "Active School Travel" OR "Active* Travel*" OR Commut* OR "Independent* Mobil*" OR "Independent* Travel*" OR "Independent Licence*" OR "Crossing Guard*" OR "Crossing Supervisor" OR "Walking School Bus*" OR "School Travel Plan*" OR "Safe Routes to School" | 38,088         |
| #2                                        | Population    | Child* OR "School Child*" OR "Elementary School*" OR "Primary School*" OR Boys OR Girls OR Youth*                                                                                                                                                                                                                                                      | 183,680        |
| #3                                        | Qualitative   | Qualitative OR Interview* OR "Focus Group"                                                                                                                                                                                                                                                                                                             | 134,727        |
| #4                                        |               | #1 AND #2 AND #3                                                                                                                                                                                                                                                                                                                                       | 126            |

## Search Two

| Database Name: Web of Science Core Collection |               |                                                                                                                                                                                                                                                                                                                                                        |                |
|-----------------------------------------------|---------------|--------------------------------------------------------------------------------------------------------------------------------------------------------------------------------------------------------------------------------------------------------------------------------------------------------------------------------------------------------|----------------|
| Date of Search: 31/03/2020                    |               |                                                                                                                                                                                                                                                                                                                                                        |                |
| Field Codes: Topic (TS)                       |               |                                                                                                                                                                                                                                                                                                                                                        |                |
| Search #                                      | Concept       | Search Terms                                                                                                                                                                                                                                                                                                                                           | No. of Results |
| #1                                            | Active Travel | Walking OR Cycling OR Bicycling OR "Active Transport*" OR "Active School Transport*" OR "Active School Travel" OR "Active* Travel*" OR Commut* OR "Independent* Mobil*" OR "Independent* Travel*" OR "Independent Licence*" OR "Crossing Guard*" OR "Crossing Supervisor" OR "Walking School Bus*" OR "School Travel Plan*" OR "Safe Routes to School" | 1,556,662      |
| #2                                            | Population    | Child* OR "School Child*" OR "Elementary School*" OR "Primary School*" OR Boys OR Girls OR Youth*                                                                                                                                                                                                                                                      | 1,842,385      |
| #3                                            | Qualitative   | Qualitative OR Interview* OR "Focus Group"                                                                                                                                                                                                                                                                                                             | 827,578        |
| #4                                            |               | #1 AND #2 AND #3                                                                                                                                                                                                                                                                                                                                       | 2,072          |

| Database Name: Web of Science Core Collection |               |                                                                                                                                                                                                                                                                                                                                                        |                |
|-----------------------------------------------|---------------|--------------------------------------------------------------------------------------------------------------------------------------------------------------------------------------------------------------------------------------------------------------------------------------------------------------------------------------------------------|----------------|
| Date of Search: 14/09/2021 (2021 Update)      |               |                                                                                                                                                                                                                                                                                                                                                        |                |
| Field Codes: Topic (TS)                       |               |                                                                                                                                                                                                                                                                                                                                                        |                |
| Search #                                      | Concept       | Search Terms                                                                                                                                                                                                                                                                                                                                           | No. of Results |
| #1                                            | Active Travel | Walking OR Cycling OR Bicycling OR "Active Transport*" OR "Active School Transport*" OR "Active School Travel" OR "Active* Travel*" OR Commut* OR "Independent* Mobil*" OR "Independent* Travel*" OR "Independent Licence*" OR "Crossing Guard*" OR "Crossing Supervisor" OR "Walking School Bus*" OR "School Travel Plan*" OR "Safe Routes to School" | 186,572        |
| #2                                            | Population    | Child* OR "School Child*" OR "Elementary School*" OR "Primary School*" OR Boys OR Girls OR Youth*                                                                                                                                                                                                                                                      | 217,783        |
| #3                                            | Qualitative   | Qualitative OR Interview* OR "Focus Group"                                                                                                                                                                                                                                                                                                             | 142,499        |
| #4                                            |               | #1 AND #2 AND #3                                                                                                                                                                                                                                                                                                                                       | 438            |

## Search Two

| Database Name: APA PsycInfo (via EBSCOhost/English Only) |               |                                                                                                                                                                                                                                                                                                                                                        |                |
|----------------------------------------------------------|---------------|--------------------------------------------------------------------------------------------------------------------------------------------------------------------------------------------------------------------------------------------------------------------------------------------------------------------------------------------------------|----------------|
| Date of Search: 31/03/2020                               |               |                                                                                                                                                                                                                                                                                                                                                        |                |
| Field Codes: Title (TI) & Abstract (AB)                  |               |                                                                                                                                                                                                                                                                                                                                                        |                |
| Search #                                                 | Concept       | Search Terms                                                                                                                                                                                                                                                                                                                                           | No. of Results |
| #1                                                       | Active Travel | Walking OR Cycling OR Bicycling OR "Active Transport*" OR "Active School Transport*" OR "Active School Travel" OR "Active* Travel*" OR Commut* OR "Independent* Mobil*" OR "Independent* Travel*" OR "Independent Licence*" OR "Crossing Guard*" OR "Crossing Supervisor" OR "Walking School Bus*" OR "School Travel Plan*" OR "Safe Routes to School" | 21,519         |
| #2                                                       | Population    | Child* OR "School Child*" OR "Elementary School*" OR "Primary School*" OR Boys OR Girls OR Youth*                                                                                                                                                                                                                                                      | 740,905        |
| #3                                                       | Qualitative   | Qualitative OR Interview* OR "Focus Group*"                                                                                                                                                                                                                                                                                                            | 393,147        |
| #4                                                       |               | #1 AND #2 AND #3                                                                                                                                                                                                                                                                                                                                       | 293            |

| Database Name: APA PsycInfo (via EBSCOhost/English Only) |               |                                                                                                                                                                                                                                                                                                                                                        |                |
|----------------------------------------------------------|---------------|--------------------------------------------------------------------------------------------------------------------------------------------------------------------------------------------------------------------------------------------------------------------------------------------------------------------------------------------------------|----------------|
| Date of Search: 14/09/2021 (2021 Update)                 |               |                                                                                                                                                                                                                                                                                                                                                        |                |
| Field Codes: Title (TI) & Abstract (AB)                  |               |                                                                                                                                                                                                                                                                                                                                                        |                |
| Search #                                                 | Concept       | Search Terms                                                                                                                                                                                                                                                                                                                                           | No. of Results |
| #1                                                       | Active Travel | Walking OR Cycling OR Bicycling OR "Active Transport*" OR "Active School Transport*" OR "Active School Travel" OR "Active* Travel*" OR Commut* OR "Independent* Mobil*" OR "Independent* Travel*" OR "Independent Licence*" OR "Crossing Guard*" OR "Crossing Supervisor" OR "Walking School Bus*" OR "School Travel Plan*" OR "Safe Routes to School" | 1,711          |
| #2                                                       | Population    | Child* OR "School Child*" OR "Elementary School*" OR "Primary School*" OR Boys OR Girls OR Youth*                                                                                                                                                                                                                                                      | 42,625         |
| #3                                                       | Qualitative   | Qualitative OR Interview* OR "Focus Group*"                                                                                                                                                                                                                                                                                                            | 32,742         |
| #4                                                       |               | #1 AND #2 AND #3                                                                                                                                                                                                                                                                                                                                       | 33             |

## Search Two

| Database Name: CINAHL PLUS w/ Full Text (via EBSCOhost/English Only) |               |                                                                                                                                                                                                                                                                                                                                                        |                |
|----------------------------------------------------------------------|---------------|--------------------------------------------------------------------------------------------------------------------------------------------------------------------------------------------------------------------------------------------------------------------------------------------------------------------------------------------------------|----------------|
| Date of Search: 31/03/2020                                           |               |                                                                                                                                                                                                                                                                                                                                                        |                |
| Field Codes: Title (TI) & Abstract (AB)                              |               |                                                                                                                                                                                                                                                                                                                                                        |                |
| Search #                                                             | Concept       | Search Terms                                                                                                                                                                                                                                                                                                                                           | No. of Results |
| #1                                                                   | Active Travel | Walking OR Cycling OR Bicycling OR "Active Transport*" OR "Active School Transport*" OR "Active School Travel" OR "Active* Travel*" OR Commut* OR "Independent* Mobil*" OR "Independent* Travel*" OR "Independent Licence*" OR "Crossing Guard*" OR "Crossing Supervisor" OR "Walking School Bus*" OR "School Travel Plan*" OR "Safe Routes to School" | 40,203         |
| #2                                                                   | Population    | Child* OR "School Child*" OR "Elementary School*" OR "Primary School*" OR Boys OR Girls OR Youth*                                                                                                                                                                                                                                                      | 572,058        |
| #3                                                                   | Qualitative   | Qualitative OR Interview* OR "Focus Group"                                                                                                                                                                                                                                                                                                             | 293,845        |
| #4                                                                   |               | #1 AND #2 AND #3                                                                                                                                                                                                                                                                                                                                       | 268            |

| Database Name: CINAHL PLUS w/ Full Text (via EBSCOhost/English Only) |               |                                                                                                                                                                                                                                                                                                                                                        |                |
|----------------------------------------------------------------------|---------------|--------------------------------------------------------------------------------------------------------------------------------------------------------------------------------------------------------------------------------------------------------------------------------------------------------------------------------------------------------|----------------|
| Date of Search: 14/09/2021 (2021 Update)                             |               |                                                                                                                                                                                                                                                                                                                                                        |                |
| Field Codes: Title (TI) & Abstract (AB)                              |               |                                                                                                                                                                                                                                                                                                                                                        |                |
| Search #                                                             | Concept       | Search Terms                                                                                                                                                                                                                                                                                                                                           | No. of Results |
| #1                                                                   | Active Travel | Walking OR Cycling OR Bicycling OR "Active Transport*" OR "Active School Transport*" OR "Active School Travel" OR "Active* Travel*" OR Commut* OR "Independent* Mobil*" OR "Independent* Travel*" OR "Independent Licence*" OR "Crossing Guard*" OR "Crossing Supervisor" OR "Walking School Bus*" OR "School Travel Plan*" OR "Safe Routes to School" | 4,851          |
| #2                                                                   | Population    | Child* OR "School Child*" OR "Elementary School*" OR "Primary School*" OR Boys OR Girls OR Youth*                                                                                                                                                                                                                                                      | 66,589         |
| #3                                                                   | Qualitative   | Qualitative OR Interview* OR "Focus Group"                                                                                                                                                                                                                                                                                                             | 37,752         |
| #4                                                                   |               | #1 AND #2 AND #3                                                                                                                                                                                                                                                                                                                                       | 31             |
